# Supplementary material
Source: PubMed Central journal article supplement (PMC4122639)

# Supplementary Figure 1

a

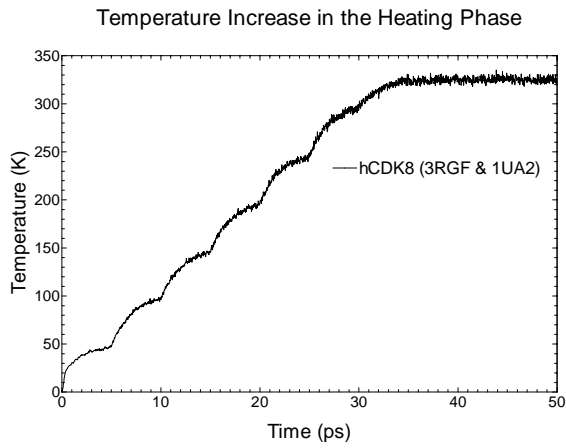

b

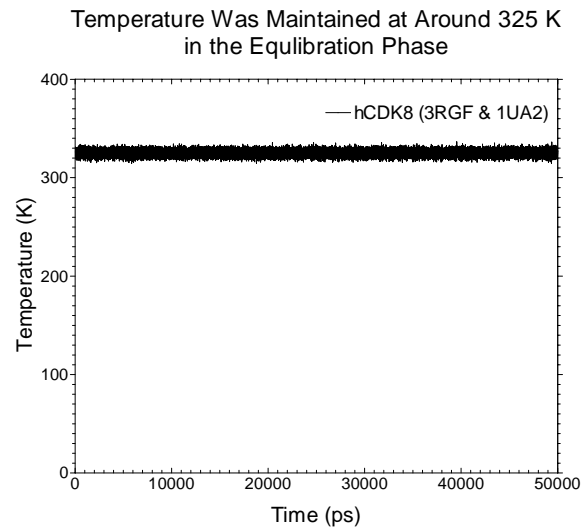

c

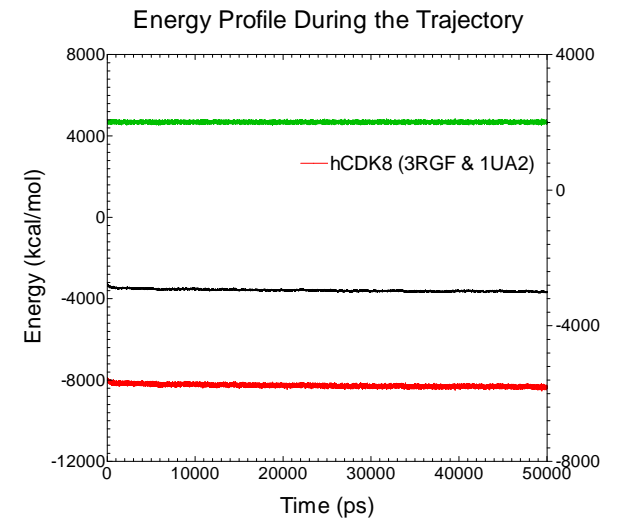

## Supplementary Figure 2

a

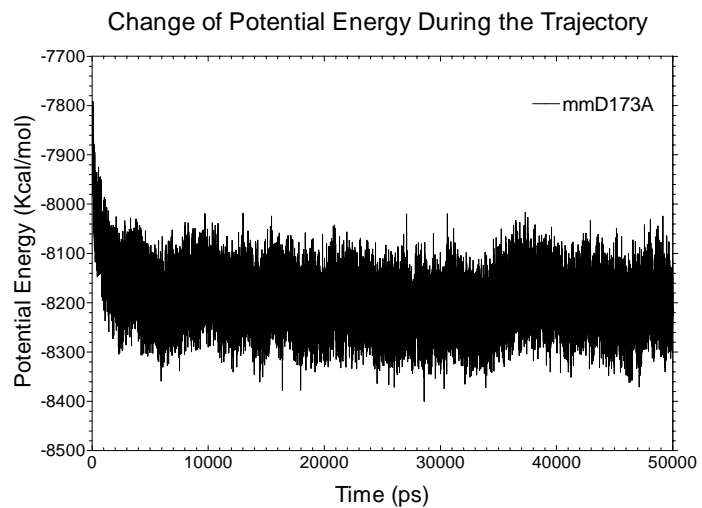

b

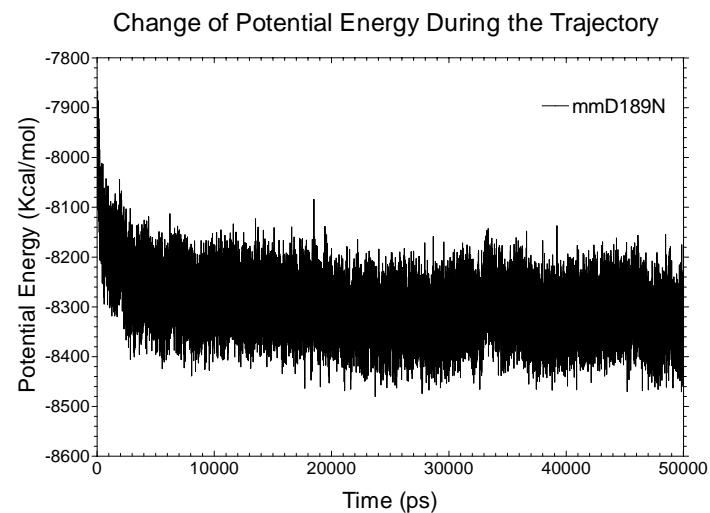

c

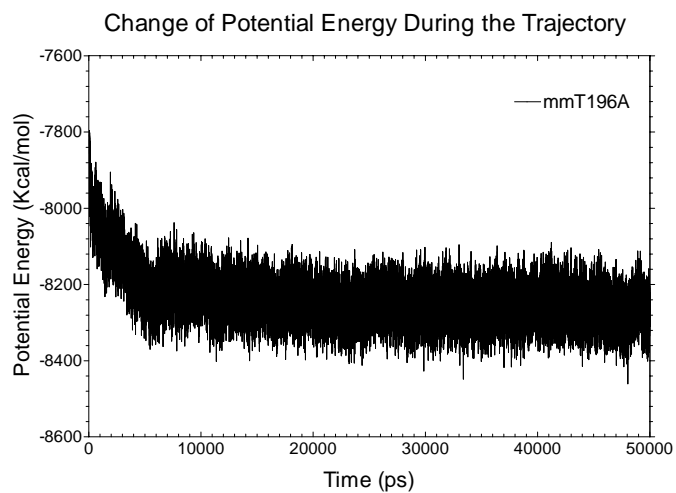

d

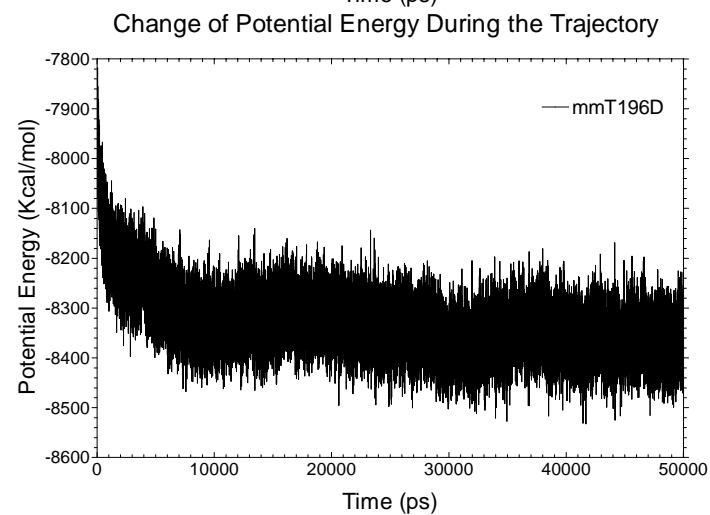

### Supplementary Figure 3

a

```
1 MDYDFKVKLS SERVEDLF EYEGCKVGRG TYGHVYKAKR KDGKDDKDYA LKQIEGTGIS MSACREIALRELKHPNVIS LQKVELSHAD RkVWLLFDYA
101 EHDLWHIIFK HRASKANKKP VQLPRGMVKS LLYQILDGIH YLHANWVLHR DLKPANILVM GEGPERGRVK IADMGEARLF NSPLKPLADL DPVVVTFWYR
201 APELLLGARH YTKAIDIWAI GCIFAELLTS EPIFHCQRQED IKTSNPYHHD QLDRIFNVMG FPADKDWEDI KKMPEHSTLM KDFRRNTYTN CSLIKYMEKH
301 KVKPDSKAFH LLQKLLTMDP IKRITSEQAM QDPYFLEDPL PTSDVFAGCQ IPYPKREFLT EEEPDDKGDK KNQQQQQGN HTNGTGHPGN QDSSHTQGPP
401 LKKVRVVPPT TTSGGLIMTS DYQRSNPAA YPNPGPSTSQ PQSSMGYSAT SQPPQYSHQ THRY
```

b

```
1 MAGNFWQS SH YLQWILDKQD LLKERQDLK FLSEEEYWKL QIFFTNVIQA LGEHLKLRQQ VIATATVYFK RFYAR YSLKSI DPVLMAPTC VFLASKVEF
101 GVVSNTRLIA AATSVLKTRF SYAFPKEFPY RMNHI LECF YLLEIMDCCL I VYHPYRPLL QYVQDMGQED MLLPLAWRIV NDTYRTDLCL LYPPFMIALA
201 CLHVACVVQQ KDARQWFAEL SVDMEKILEI IRVILKLYEQ WKNFDERKEM ATILSKMPKP KPPNSEGEQ GPNGSQNSSY SQS
```

Supplementary Figure 4

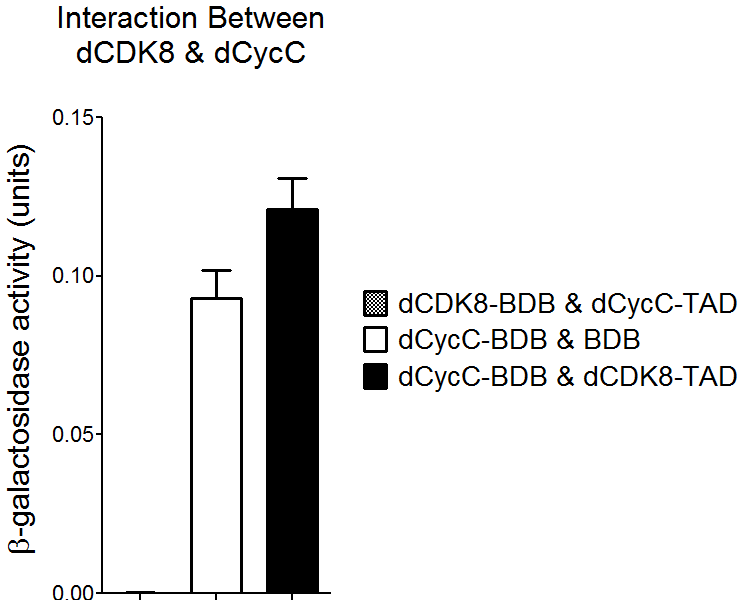

Supplementary Figure 5

a

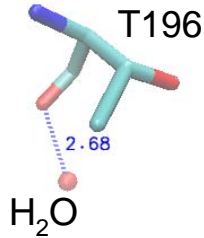

b

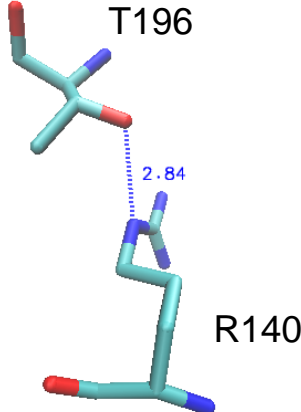

c

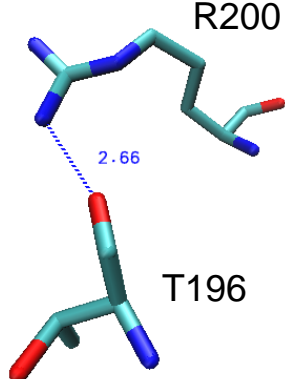

d

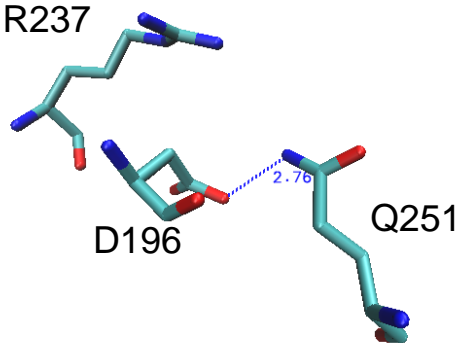

Supplement: NIHMS584461-supplement-01.pdf [file NIHMS584461-supplement-01.pdf]
